# Supplementary material for: Multifunctional silicon calcium phosphate composite scaffolds promote stem cell recruitment and bone regeneration
Source: Royal Society of Chemistry journal article supplement (doi:10.1039/d2tb00687a), 2022-01-01
Supplement: d2tb00687a1.pdf [file d2tb00687a1.pdf]

## Supplementary Information

### **Multifunctional silicon calcium phosphate composite scaffolds promote stem cell recruitment and bone regeneration**

Rui Zhang<sup>a</sup>, Ye He<sup>b</sup>, Bailong Tao<sup>c</sup>, Jing Wu<sup>a</sup>, Xuan Li<sup>a</sup>, Xinqiang Hu<sup>a</sup>, Zengzilu Xia<sup>a\*</sup>, and  
Kaiyong Cai<sup>a\*</sup>

<sup>a</sup>Key Laboratory of Biorheological Science and Technology, Ministry of Education,  
College of Bioengineering, Chongqing University, Chongqing, 400044, China.

<sup>b</sup>Thomas Lord Department of Mechanical Engineering and Material Science, Duke  
University Durham, NC 27708, USA.

<sup>c</sup>Laboratory Research Center, The First Affiliated Hospital of Chongqing Medical  
University, Chongqing, China.

\*Corresponding author: Dr. Zengzilu Xia & Dr. Kaiyong Cai

E-mail: zzlxia@cqu.edu.cn, kaiyong\_cai@cqu.edu.cn.

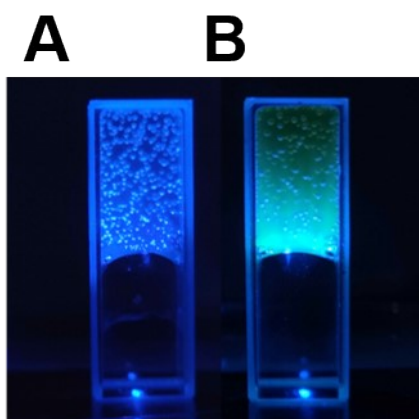

**Fig. S1.** (A) SF hydrogel and (B) SF@PFS-FITC hydrogel under blue excitation light.

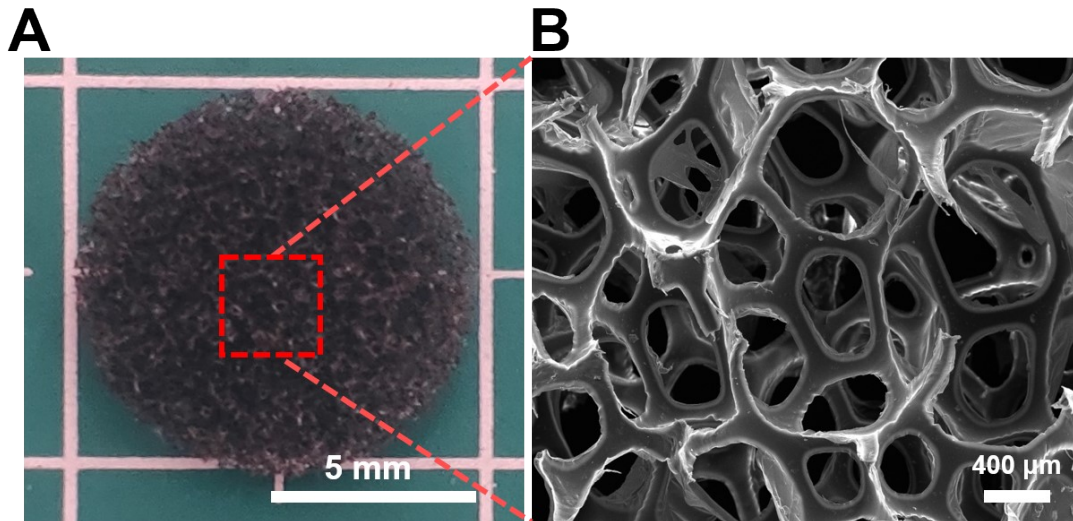

**Fig. S2.** The (A) photograph and (B) SEM geometry of the foam template.

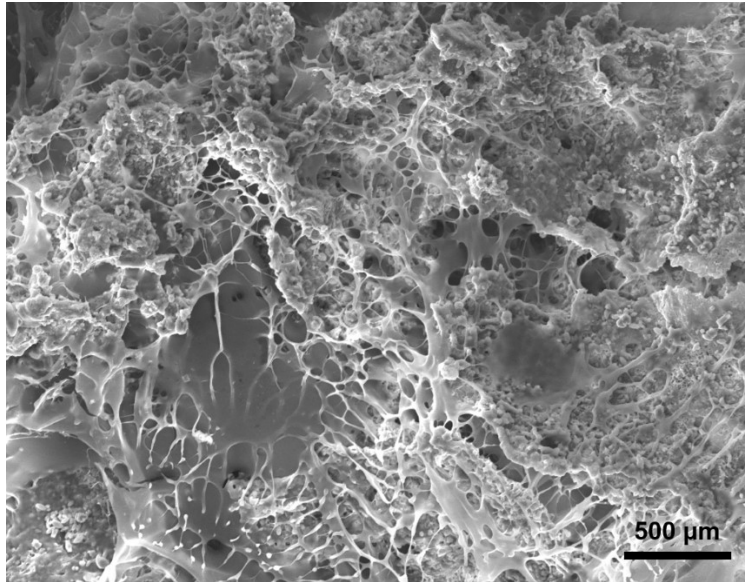

**Fig. S3.** SEM image of silicon calcium phosphate-SF hydrogel composite scaffold.

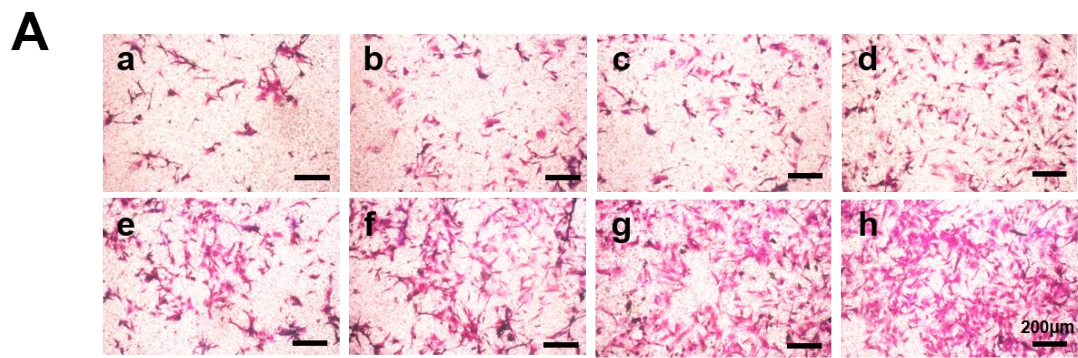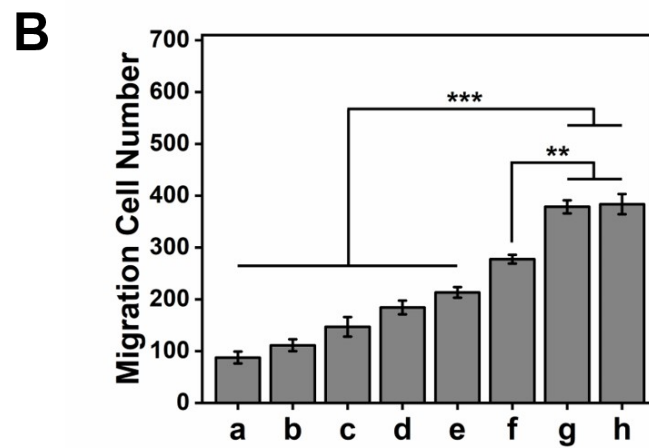

**Fig. S4.** (A) Migrated MSCs staining of different concentration of groups after culture for 24 h, a-h: 0, 0.00032, 0.0016, 0.008, 0.04, 0.2, 1, and 5 mg/mL; (B) quantitative counting of migrated MSCs. Error bars represent means  $\pm$  SD for n = 6, \*p < 0.05, \*\*p < 0.01.

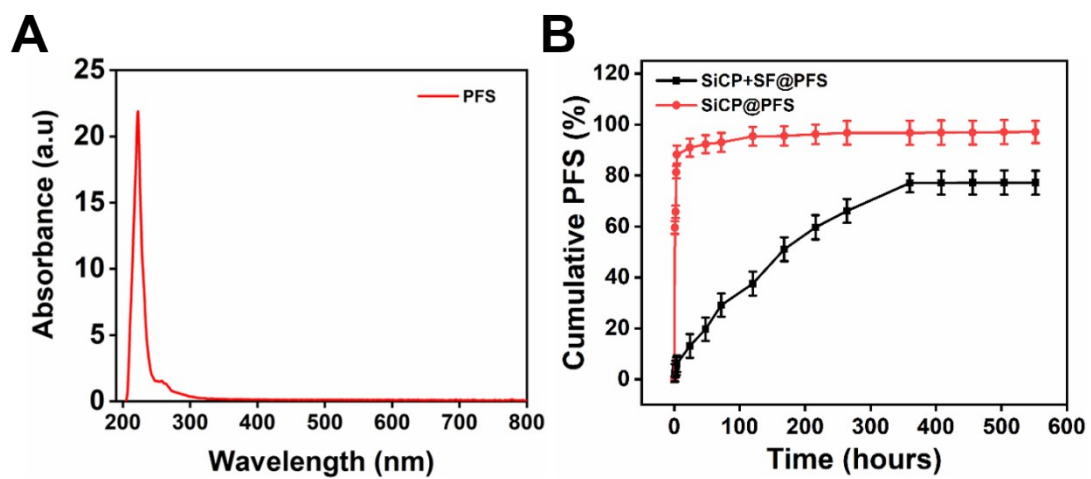

**Fig. S5.** (A) Ultraviolet absorption characteristic peak of PFS peptides at 214 nm; (B) percentage of cumulative release of PFS peptides.

**Table S1. The quantitative measurement of different ions released from scaffolds**

| <i>Days</i> | <i>Samples</i> | <i>P (mg/L)</i> | <i>Si (mg/L)</i> | <i>Ca (mg/L)</i> |
|-------------|----------------|-----------------|------------------|------------------|
| <b>7</b>    | SiCP           | 10.6±0.35       | 5.73±0.50        | 17.73±0.35       |
|             | SiCP+SF        | 4.56±0.45       | 2.96±0.99        | 6.64±0.47        |
|             | SiCP+SF@PFS    | 5.12±0.23       | 2.25±0.38        | 8.64±0.44        |
| <b>14</b>   | SiCP           | 23.79±1.22      | 11.97±0.70       | 36.64±0.41       |
|             | SiCP+SF        | 23.99±0.65      | 11.99±0.71       | 35.12±0.56       |
|             | SiCP+SF@PFS    | 21.37±0.63      | 10.19±0.58       | 34.49±1.59       |
| <b>21</b>   | SiCP           | 39.75±1.78      | 20.44±0.78       | 62.72±0.89       |
|             | SiCP+SF        | 41.45±2.81      | 21.60±0.53       | 61.26±1.03       |
|             | SiCP+SF@PFS    | 39.60±0.98      | 20.48±0.92       | 60.59±1.47       |

**Table S2. Real-time PCR primers used in this study**

| <i>Target gene</i> | <i>Primers sequences</i>                                              |
|--------------------|-----------------------------------------------------------------------|
| OSX                | F: 5'-CACCCATTGCCAGTAATCTTCGTG -3'<br>R: 5'-CATAGTGAGCTTCTTCCTGGGG-3' |
| Runx 2             | F: 5'-GCCGTAGAGAGCAGGGAAGAC-3'<br>R: 5'-CTGGCTTGGATTAGGGAGTCAC-3'     |
| COL I              | F: 5'-CCTGAGCCAGCAGATTGA-3'<br>R: 5'-TCCGCTCTCCAGTCAG-3'              |
| OCN                | F: 5'-GAGGGCAGTAAGGTGGTGAA-3'<br>R: 5'-CGTCCTGGAAGCCAATGTG-3'         |
| GAPDH              | F: 5'-TGC GTT GTT GCGGTCCAC-3'<br>R: 5'-GGCATTGCTCTCAATGACAA-3'       |
